# Supplementary material
Source: PubMed Central journal article supplement (PMC3251158)
Supplement: 1109227109_pnas.201109227SI.pdf [file 1109227109_pnas.201109227SI.pdf]

# Supporting Information

Kelley et al. 10.1073/pnas.1109227109

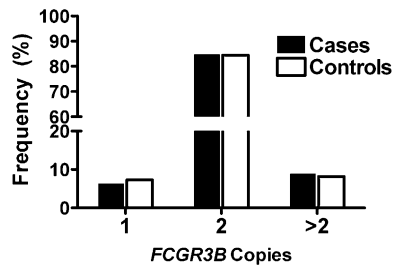

**Fig. S1.** Copy number variation at *FCGR3B* is not different between patients with Granulomatosis with Polyangiitis (Wegener's) (GPA) and healthy controls. A null allele at the *FCGR3B* locus has been associated with susceptibility to GPA (1, 2); however, this finding has not been replicated among all studies (3). Presence of this structural variant could complicate comparisons of the frequency of NA1/NA2 alleles between our case and control groups. Therefore, we sought to determine if copy number variation (CNV) at *FCGR3B* would differ between patients and controls and found the same levels of variation. Using a quantitative Pyrosequencing approach, we have determined the relative copy number of *FCGR3B* (relative to *FCGR3A*). In brief, we have used primers (Forward: TCCACCTGGGTACCAAGTCTCT; Reverse: TTGAGGGTCTTTCTCCATT- TAA) that intentionally amplify a genomic region including exon 5 of both *FCGR3A* and *FCGR3B* in 460 Caucasian patients with GPA and 562 Caucasian healthy controls by quantitative Pyrosequencing. This region contains a single nucleotide difference between the genes. The relative levels of each gene were then determined on the PSQ96HA (Qiagen) through quantitation of the single nucleotide that differs between the genes (Pyrosequencing primer: TCTCTGTGAAGACAAACATT). In our Caucasian population of patients with GPA and healthy controls, we did not detect any individuals homozygous for the *FCGR3B* deletion. As shown in the figure, we did observe both *FCGR3B* deletion (i.e., one copy of the gene) and *FCGR3B* duplication; the frequency of this CNV did not differ between cases and controls ( $\chi^2 = 0.52$ ,  $P = 0.770$ ). We recognize that a small proportion of our population may also express CNV at the *FCGR3A* locus. However, the frequency of this CNV is quite low in Caucasian populations (3), and frequencies of *FCGR3B* deletion/duplication in our healthy control population (7.3%/8.2% respectively) are consistent with prior determinations using paralogous ratio tests (3).

1. Fanciulli M, et al. (2007) *FCGR3B* copy number variation is associated with susceptibility to systemic, but not organ-specific, autoimmunity. *Nat Genet* 39:721–723.
2. Aitman TJ, et al. (2006) Copy number polymorphism in *Fcgr3* predisposes to glomerulonephritis in rats and humans. *Nature* 439:851–855.
3. Niederer HA, et al. (2010) Copy number, linkage disequilibrium and disease association in the *FCGR* locus. *Hum Mol Genet* 19:3282–3294.

**Table S1. Mucosal, cutaneous, and renal manifestations are observed in patients with GPA enrolled in Wegener's Granulomatosis Genetics Repository**

| Criteria or involvement                       | Disease manifestation         | Percentage of patients (%) |
|-----------------------------------------------|-------------------------------|----------------------------|
| ACR Criteria                                  | Nasal or oral inflammation    | 84.8                       |
|                                               | Active urinary sediment       | 53.2                       |
|                                               | Abnormal chest X-ray          | 69.2                       |
|                                               | Granulomatous inflammation    | 70.6                       |
| Mucosal involvement (upper respiratory tract) | Sinus involvement             | 77.8                       |
|                                               | Nasal crusting/bleeding ulcer | 71.9                       |
|                                               | Nasal septal perforation      | 11.9                       |
|                                               | Subglottic stenosis           | 11.1                       |
|                                               | Oral ulcers/gingivitis        | 10.3                       |
| Cutaneous involvement                         | Saddle nose                   | 9.2                        |
|                                               | Cutaneous vasculitis          | 31.7                       |
| Renal involvement                             | Hematuria                     | 54.9                       |
|                                               | Elevated serum creatinine     | 42.7                       |
|                                               | End-stage renal disease       | 11.5                       |

These data are from physician-completed chart reviews on 477 patients enrolled in WGGER. Presence of a manifestation was considered if "ever present" in the medical record and not explainable by a non-GPA cause. ACR, American College of Rheumatology; Wegener's Granulomatosis Genetics Repository, WGGER.

**Table S2. Mucosal, cutaneous, and renal manifestations are observed in patients with GPA enrolled in Vasculitis Clinical Research Consortium**

| Disease manifestation       | Percentage of patients (%) |
|-----------------------------|----------------------------|
| Ear/nose/throat involvement | 84.7                       |
| Renal involvement           | 53.8                       |
| Elevated serum creatinine   | 52.6                       |
| Patient required dialysis   | 14.7                       |
| Skin involvement            | 33.2                       |

These data are from physician-completed chart reviews on 263 Wegener's granulomatosis patients enrolled in Vasculitis Clinical Research Consortium. Presence of a manifestation was considered if "ever present" in the medical record without other identifiable non-GPA cause.
